# Supplementary material for: Berberine Suppresses Bladder Cancer Cell Proliferation by Inhibiting JAK1-STAT3 Signaling via Upregulation of miR-17-5p
Source: Research Square preprint supplement (doi:10.21203/rs.3.rs-135605/v1), 2020-12-29
Supplement: Supplementary file 1 [file ad8281a440dda3749d1fd103.xlsx]

## Sheet: Sheet1
Supplementary Table 1. Antibodies used in IHC staining and western blot
Name	Corportation	Cat Number
rabbit anti- P- (Erk1/2) (Thr202/Tyr204)	Cell Signaling Technology	#9101
rabbit anti-AKT (phospho Ser473)	ImmunoWay Biotechnology Company	YP0006
rabbit anti-AKT (phospho T308)	Abcam	ab66134
mouse anti-STAT3	Abcam	Ab5073
rabbit anti-STAT3 (phospho Tyr705)	Cell Signaling Technology	#9145
Mouse anti-α-Tubulin	Cell Signaling Technology	#3873
rabbit anti-Histone H3	Abcam	ab1791
mouse anti-JAK1	Santa Cruz Biotechnology	sc-376996
mouse anti-JAK2	Santa Cruz Biotechnology	sc-390539
rabbit anti-JAK1 (phospho Tyr1034/1035)	Cell Signaling Technology	#74129
rabbit anti-JAK2 (phospho Tyr1007/1008)	Cell Signaling Technology	#3771
rabbit anti-CDK4	Abcam	ab108357
rabbit anti-CDK2	Abcam	ab32147
rabbit anti-CDK1	Abcam	ab133327
rabbit anti-Cyclin D1	Abcam	ab134175
rabbit anti-Cyclin A	Abcam	ab185619
rabbit anti-Cyclin E	Abcam	ab33911
mouse anti-β-actin	Santa Cruz Biotechnology	sc-69879
rabbit anti-Vimentin	Cell Signaling Technology	#5741
rabbit anti-N-Cadherin	Cell Signaling Technology	#13116
rabbit anti-Snail	Cell Signaling Technology	#3879
rabbit anti-cleaved caspase-3	Cell Signaling Technology	#9661
rabbit anti-caspase-3	Cell Signaling Technology	#9662
mouse anti-p53	Santa Cruz Biotechnology	sc-126
